# Supplementary material for: Cortical vein involvement and its influence in a cohort of adolescents with cerebral venous thrombosis
Source: Thromb J. 2023 Jul 24;21:78. doi: 10.1186/s12959-023-00521-3 (PMC10367417; doi:10.1186/s12959-023-00521-3)
Supplement: Supplementary file 2 — Supplementary Material 2 [file 12959_2023_521_MOESM2_ESM.xlsx]

## Sheet: Sheet1
Supplementary Table 2 Demographic data and Clinical characteristics of CVT in Adolescents according to Sex.
	Total (n = 53)	Male	Female	P value
		(n = 29)	(n = 24)
Mean age(y), Mean ± SD	15.2 ± 1.8	15.2 ± 2.0	15.2 ± 1.5	0.876
Type of onset*, n(%)	47 (88.7)	28 (96.6)	19 (79.2)	0.08
BMI, Mean ± SD	22.6 ± 5.2	22.5 ± 5.1	22.8 ± 5.4	0.852
Mean delay between first symptom	7.0 ± 14.9	4.6 ± 7.1	9.8 ± 20.7	0.22
and diagnosis(SD), d
mRS 0-1 at admission, n(%)	42 (79.2)	27 (93.1)	15 (62.5)	0.015
Deterioration during hospitalization, n(%)	8 (15.1)	4 (13.8)	4 (16.7)	1
mRS 0-1 at discharge, n(%)	5 ( 9.4)	2 (6.9)	3 (12.5)	0.649
CVST-associated conditions, n(%)
Malignant hemopathy/cancer	1 ( 1.9)	0 (0)	1 (4.2)	0.453
Myeloproliferative neoplasms	2 ( 3.8)	1 (3.4)	1 (4.2)	1
PNH	2 ( 3.8)	0 (0)	2 (8.3)	0.2
Systemic disease	12 (22.6)	4 (13.8)	8 (33.3)	0.091
Thrombophilia	24 (45.3)	17 (58.6)	7 (29.2)	0.032
Anemia	14 (26.4)	1 (3.4)	13 (54.2)	< 0.001
General cause of hypercoagulability	16 (30.2)	2 (6.9)	14 (58.3)	< 0.001
Homocysteinemia	19 (35.8)	14 (48.3)	5 (20.8)	0.038
Infection	16 (30.2)	9 (31)	7 (29.2)	0.883
Noninfectious local cause	4 ( 7.5)	3 (10.3)	1 (4.2)	0.617
CVST risk factors, n(%)	14 (27.5)	7 (25)	7 (30.4)	0.665
Oral contraception	1 ( 1.9)	0 (0)	1 (4.2)	0.453
Obesity	13 (25.5)	7 (25)	6 (26.1)	0.929
Clinical presentation, n(%)
Headache，ICP ↑†	35 (67.3)	19 (67.9)	16 (66.7)	0.927
Papilloedema	33 (62.3)	17 (58.6)	16 (66.7)	0.547
Visual disturbance	9 (17.0)	4 (13.8)	5 (20.8)	0.715
Seizure	14 (26.4)	6 (20.7)	8 (33.3)	0.299
Focal neurological deficits‡	12 (22.6)	5 (17.2)	7 (29.2)	0.302
Encephalopathy§	11 (20.8)	4 (13.8)	7 (29.2)	0.194
Abbreviations: CVT, cortical vein thrombosis; SD, standard deviation; BMI, body mass index; mRS，modified Rankin Scale; CVST, cerebral venous thrombosis; PNH, paroxysmal nocturnal hemoglobinuria; ICP, intracranial pressure.
* acute/subacute
† Elevated intracranial pressure with opening pressure of >25 cm H2O
‡ Motor deficits, aphasia, sensory deficits, hemianopia
§ Neuropsychological symptom, disturbance of consciousness, coma
